# Supplementary material for: TyroFill–Titanium Implant Constructs for the Coordinated Repair of Rabbit Mandible and Tooth Defects
Source: MDPI journal article supplement (doi:10.3390/bioengineering10111277), 2023-11-02
Supplement: s1 [file s1]

Supplementary Materials

# TyroFill–Titanium Implant Constructs for the Coordinated Repair of Rabbit Mandible and Tooth Defects

Weibo Zhang <sup>1</sup>, Joachim Kohn <sup>2</sup> and Pamela C. Yelick <sup>1,\*</sup>

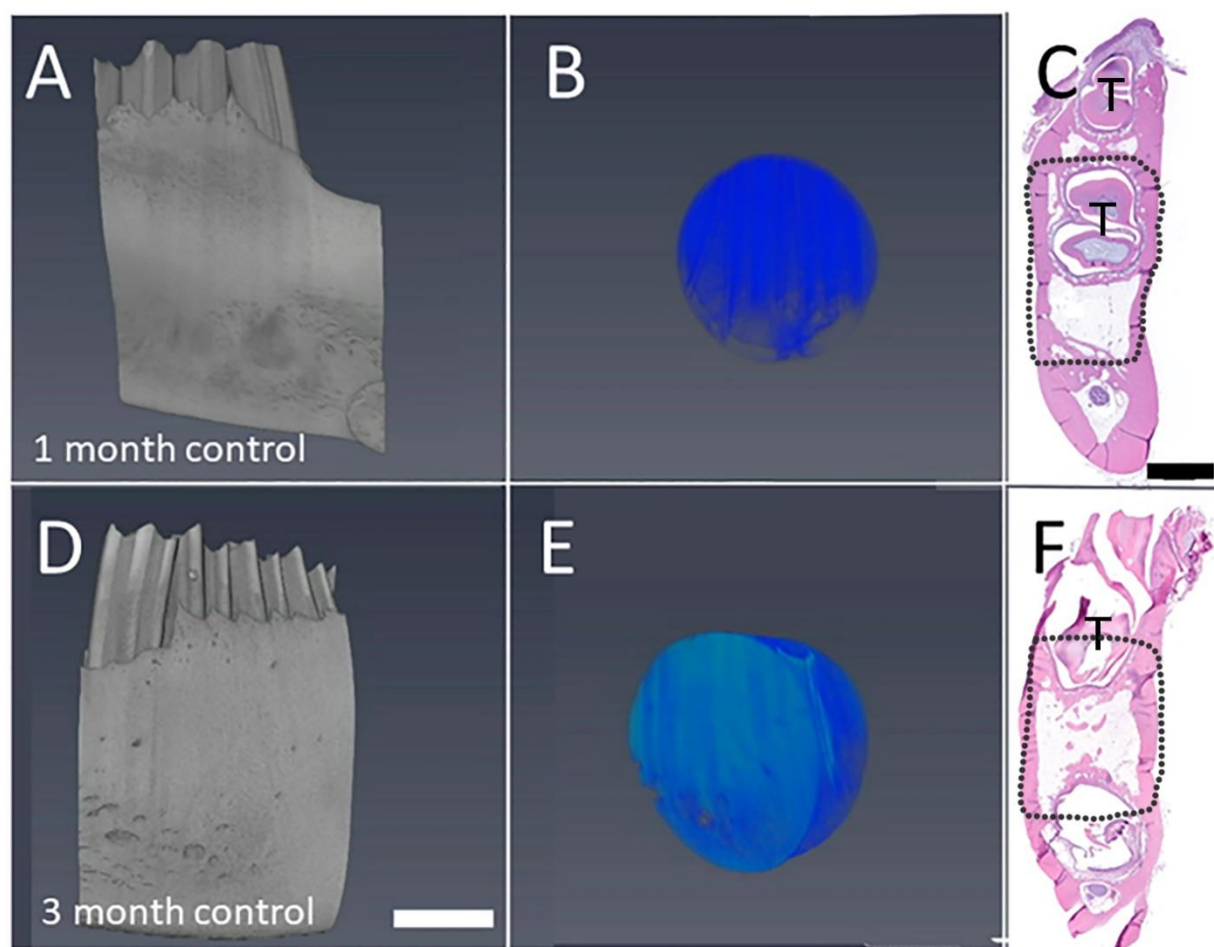

**Figure S1.** Microcomputed tomography ( $\mu$ CT) and histology of unoperated control mandibles. (A,B) 1 month and (D,E) 3 months control mandibles. (A,D) 3D reconstructed  $\mu$ CT data. (B,E) A selected 10 mm x 6 mm region of interest. (C,F) Stained sectioned 1 month (C) and 3 months (F) control mandibles. Dotted lines indicate the approximate position of implant placement. Abbreviations: T, Tooth. Scale bars = 2mm.

**Table S1:** Microcomputed tomography ( $\mu$ CT) data of harvested implants. TryoFill constructs showed improved new bone formation as compared to previously used E1001(1K)-bTCP constructs. No significant differences were observed due to the limited number of implants placed in this study.

| TryoFill |             | Bone Density    | BV/TV (%)         | Trabecular Thickness (mm) |
|----------|-------------|-----------------|-------------------|---------------------------|
| 1M       | Cell seeded | $0.65 \pm 0.02$ | $19.65 \pm 5.87$  | $0.33 \pm 0.13$           |
|          | Acellular   | $0.70 \pm 0.11$ | $15.35 \pm 3.81$  | $0.26 \pm 0.00$           |
|          | Control     | $0.67 \pm 0.13$ | $61.12 \pm 11.02$ | $0.65 \pm 0.05$           |
| 3M       | Cell seeded | $0.38 \pm 0.08$ | $56.05 \pm 10.13$ | $0.87 \pm 0.52$           |
|          | Acellular   | $0.56 \pm 0.01$ | $39.42 \pm 10.98$ | $0.51 \pm 0.00$           |
|          | Control     | $0.62 \pm 0.08$ | $53.50 \pm 4.22$  | $0.58 \pm 0.07$           |

| E1001(1K)-bTCP |             | Bone Density    | BV/TV (%)         | Trabecular Thickness (mm) |
|----------------|-------------|-----------------|-------------------|---------------------------|
| 1M             | Cell seeded | $0.54 \pm 0.06$ | $5.79 \pm 2.47$   | $0.07 \pm 0.04$           |
|                | Acellular   | $0.46 \pm 0.12$ | $13.05 \pm 6.8$   | $0.11 \pm 0.01$           |
|                | Control     | $0.47 \pm 0.24$ | $49.67 \pm 0.00$  | $0.264 \pm 0.00$          |
| 3M             | Cell seeded | $0.52 \pm 0.06$ | $19.45 \pm 10.57$ | $0.19 \pm 0.11$           |
|                | Acellular   | $0.4 \pm 0.10$  | $18.51 \pm 0.00$  | $0.19 \pm 0.00$           |
|                | Control     | $0.42 \pm 0.21$ | $42.94 \pm 0.00$  | $0.43 \pm 0.00$           |

**Table S2:** EDAX analysis of Ti Dental Implant Surfaces. Calcium was not detected on the surface of unimplanted control or 1-week *in vitro* cultured acellular Ti dental implants. Calcium was detected on the surface of Ti dental implants removed from 1 month and 3 month implanted constructs, although no obvious trend was observed likely due to the limited number of samples used in this study.

| Ca <sup>++</sup>   | % Weight |       |
|--------------------|----------|-------|
|                    | Average  | SD    |
| Unoperated Control | 0.00%    | 0.000 |
| 1W Cell seeded     | 0.17%    | 0.002 |
| 1W Acellular       | 0.00%    | 0.000 |
| 1M Cell seeded     | 1.04%    | 0.013 |
| 1M Acellular       | 0.49%    | 0.005 |
| 3M Cell seeded     | 0.13%    | 0.001 |
| 3M Acellular       | 0.62%    | 0.007 |

### Supplemental Videos 1–6:

**Video S1.**  $\mu$ CT analysis of a cell-seeded construct after 1 month implantation. Scattered radio-opaque areas indicate calcified tissue formation throughout the implant site.

**Video S2.**  $\mu$ CT analysis of an acellular construct after 1 month implantation. Very few radio-opaque areas of calcification were observed throughout the implant site.

**Video S3.**  $\mu$ CT analysis of an unoperated control mandible at 1 month.

**Video S4.**  $\mu$ CT analysis of a cell-seeded construct after 3 months implantation. Highly calcified mineralized tissue nodules indicative of new bone formation were observed throughout the implanted site.

**Video S5.**  $\mu$ CT analysis of an acellular construct after 3 months implantation. Newly formed bone can be observed throughout the implant, but less than seen in cell-seeded constructs.

**Video S6.**  $\mu$ CT CT analysis of an unoperated control mandible at 3 months.
