# Supplementary material for: TyroFill–Titanium Implant Constructs for the Coordinated Repair of Rabbit Mandible and Tooth Defects
Source: Bioengineering (Basel). 2023 Nov 2;10(11):1277. doi: 10.3390/bioengineering10111277 (PMC10668976; doi:10.3390/bioengineering10111277)
Supplement: Supplementary file 1 [file bioengineering-10-01277-s001.zip]

Archive with 7 entries (7 files):
- Supplement Video 1.mp4
- Supplement Video 2.mp4
- Supplement Video 3.mp4
- Supplement Video 4.mp4
- Supplement Video 5.mp4
- Supplement Video 6.mp4
- Supplemental Data - Bioengineering 2023 110123.pdf
